# Supplementary material
Source: PubMed Central journal article supplement (PMC7484197)
Supplement: NIHMS1591965-supplement-1.pdf [file NIHMS1591965-supplement-1.pdf]

**Appendix**  
**Opioid Use Disorder Treatment Facilities With Programs for Special Populations**  
**Hadland et al.**

**Appendix Table 1.** Counties With Facilities That Provide or Allow Medications and Offer Services in Spanish (*n*=3,142)

| <b>Characteristic</b>              | <b>Percentage of counties with services in Spanish, %</b> |
|------------------------------------|-----------------------------------------------------------|
| <b>U.S. Census Bureau division</b> |                                                           |
| New England                        | 47.8                                                      |
| Middle Atlantic                    | 48.0                                                      |
| East North Central                 | 17.2                                                      |
| West North Central                 | 5.3                                                       |
| South Atlantic                     | 20.4                                                      |
| East South Central                 | 5.2                                                       |
| West South Central                 | 12.6                                                      |
| Mountain                           | 32.7                                                      |
| Pacific                            | 49.7                                                      |
| <b>Rural/Urban classification</b>  |                                                           |
| Large central metro                | 94.1                                                      |
| Large fringe metro                 | 34.5                                                      |
| Medium metro                       | 38.7                                                      |
| Small metro                        | 21.2                                                      |
| Micropolitan                       | 16.2                                                      |
| Noncore                            | 4.7                                                       |
| Medically underserved area         | 7.6                                                       |

**Appendix**  
**Opioid Use Disorder Treatment Facilities With Programs for Special Populations**  
**Hadland et al.**

**Appendix Table 2.** County-level Characteristics Associated With Availability of Opioid Use Disorder Treatment Facilities That Provide or Allow Medications, Univariate Analyses ( $n=3,142$ )

| Characteristic                 | Any program                         | Programs for veterans               | Programs for pregnant and postpartum women | Programs that accept adolescents    |
|--------------------------------|-------------------------------------|-------------------------------------|--------------------------------------------|-------------------------------------|
|                                | Unadjusted RR (95% CI) <sup>a</sup> | Unadjusted RR (95% CI) <sup>a</sup> | Unadjusted RR (95% CI) <sup>a</sup>        | Unadjusted RR (95% CI) <sup>a</sup> |
| % male                         | <b>0.90 (0.83, 0.97)**</b>          | 0.92 (0.82, 1.03)                   | <b>0.86 (0.79, 0.94)***</b>                | 0.95 (0.86, 1.05)                   |
| Age distribution, years        |                                     |                                     |                                            |                                     |
| % age 0–19                     | ref                                 | ref                                 | ref                                        | ref                                 |
| % age 20–24                    | <b>0.84 (0.76, 0.94)**</b>          | 0.83 (0.67, 1.03)                   | 0.88 (0.75, 1.02)                          | 0.95 (0.93, 1.02)                   |
| % age 25–44                    | 1.02 (1.00, 1.05)                   | <b>1.08 (1.05, 1.11)***</b>         | 1.01 (0.99, 1.03)                          | 0.98 (0.94, 1.03)                   |
| % age 45–64                    | 1.04 (0.99, 1.09)                   | 1.05 (0.98, 1.12)                   | 1.03 (0.98, 1.08)                          | 1.02 (0.97, 1.07)                   |
| % age ≥65                      | 1.02 (0.99, 1.04)                   | 0.98 (0.96, 1.01)                   | <b>1.04 (1.01, 1.07)**</b>                 | 1.03 (0.99, 1.07)                   |
| % non-Hispanic white           | <b>1.01 (1.00, 1.01)**</b>          | <b>0.99 (0.99, 1.00)**</b>          | 1.01 (1.00, 1.01)                          | 1.01 (1.00, 1.02)                   |
| % unemployed                   | 1.01 (1.00, 1.02)                   | 1.02 (1.00, 1.04)                   | <b>1.02 (1.00, 1.04)*</b>                  | 1.01 (0.99, 1.02)                   |
| % living in poverty            | 1.01 (1.00, 1.03)                   | <b>1.05 (1.03, 1.06)***</b>         | <b>1.03 (1.01, 1.04)**</b>                 | 1.01 (0.99, 1.03)                   |
| % uninsured                    | <b>0.97 (0.95, 0.99)**</b>          | 1.01 (0.97, 1.04)                   | <b>0.97 (0.94, 1.00)*</b>                  | <b>0.97 (0.95, 0.99)**</b>          |
| % with public health insurance | <b>1.02 (1.01, 1.03)**</b>          | <b>1.02 (1.00, 1.04)*</b>           | <b>1.04 (1.02, 1.06)***</b>                | <b>0.97 (0.95, 0.99)**</b>          |
| U.S. Census Bureau division    |                                     |                                     |                                            |                                     |
| New England                    | ref                                 | ref                                 | ref                                        | ref                                 |
| Middle Atlantic                | <b>0.61 (0.50, 0.73)***</b>         | 0.84 (0.58, 1.20)                   | <b>0.47 (0.37, 0.60)***</b>                | 1.02 (0.76, 1.37)                   |
| East North Central             | <b>0.61 (0.43, 0.61)***</b>         | <b>0.46 (0.35, 0.62)***</b>         | <b>0.37 (0.29, 0.46)***</b>                | <b>0.69 (0.52, 0.92)*</b>           |
| West North Central             | <b>0.72 (0.53, 0.97)*</b>           | <b>0.57 (0.43, 0.75)***</b>         | <b>0.53 (0.40, 0.71)***</b>                | 1.29 (0.80, 2.06)                   |
| South Atlantic                 | <b>0.45 (0.32, 0.62)***</b>         | <b>0.43 (0.28, 0.65)***</b>         | <b>0.41 (0.30, 0.57)***</b>                | <b>0.57 (0.38, 0.85)**</b>          |
| East South Central             | <b>0.54 (0.35, 0.83)**</b>          | <b>0.49 (0.27, 0.86)*</b>           | <b>0.45 (0.30, 0.68)***</b>                | 0.84 (0.38, 0.85)                   |
| West South Central             | <b>0.26 (0.18, 0.37)***</b>         | <b>0.27 (0.16, 0.46)***</b>         | <b>0.20 (0.13, 0.31)***</b>                | <b>0.38 (0.24, 0.59)***</b>         |
| Mountain                       | <b>0.60 (0.39, 0.91)*</b>           | 0.73 (0.51, 1.06)                   | <b>0.46 (0.30, 0.70)***</b>                | 0.85 (0.59, 1.22)                   |
| Pacific                        | <b>0.43 (0.30, 0.63)***</b>         | <b>0.59 (0.43, 0.82)**</b>          | <b>0.38 (0.29, 0.48)***</b>                | <b>0.40 (0.19, 0.82)*</b>           |
| Rural/Urban classification     |                                     |                                     |                                            |                                     |
| Large central metro            | ref                                 | ref                                 | ref                                        | ref                                 |
| Large fringe metro             | 0.92 (0.75, 1.12)                   | <b>0.57 (0.43, 0.76)***</b>         | 0.86 (0.72, 1.02)                          | <b>1.25 (1.05, 1.49)*</b>           |

**Appendix**  
**Opioid Use Disorder Treatment Facilities With Programs for Special Populations**  
**Hadland et al.**

|                                                |                            |                           |                             |                             |
|------------------------------------------------|----------------------------|---------------------------|-----------------------------|-----------------------------|
| Medium metro                                   | 1.13 (0.95, 1.34)          | <b>0.72 (0.57, 0.93)*</b> | <b>1.27(1.07, 1.55)**</b>   | <b>1.41 (1.18, 1.68)***</b> |
| Small metro                                    | <b>1.25 (1.02, 1.53)*</b>  | <b>0.73 (0.56, 0.95)*</b> | <b>1.55 (1.25, 1.93)***</b> | <b>1.82 (1.39, 2.45)***</b> |
| Micropolitan                                   | <b>1.44 (1.14, 1.81)**</b> | 0.83 (0.63, 1.08)         | <b>1.70 (1.40, 2.07)***</b> | <b>2.36 (1.81, 3.07)***</b> |
| Noncore                                        | 1.38 (0.93, 2.05)          | <b>0.71 (0.54, 0.94)*</b> | <b>1.77 (1.31, 2.39)***</b> | <b>2.52 (1.82, 3.49)***</b> |
| Medically underserved area                     | 1.03 (0.87, 1.23)          | 0.87 (0.68, 1.12)         | 1.00 (0.79, 1.27)           | 1.07 (0.67, 1.70)           |
| Opioid prescriptions rate per 100 <sup>b</sup> | 1.00 (1.00, 1.01)          | 1.00 (0.99,1.00)          | <b>1.01 (1.01, 1.01)***</b> | 1.01 (1.00, 1.01)           |
| Opioid overdose rate per 100,000 <sup>c</sup>  | <b>1.00 (1.00, 1.00)*</b>  | <b>1.00 (1.00, 1.00)*</b> | <b>1.01 (1.01, 1.01)***</b> | 1.01 (0.99, 1.02)           |

<sup>a</sup>Boldface indicates statistical significance (\* $p < 0.05$ ; \*\* $p < 0.01$ ; \*\*\* $p < 0.001$ ). Analyses are adjusted for all variables listed in the table.

<sup>b</sup>180 counties excluded from analyses due to missing data.

<sup>c</sup>Mean rate for the period 2014–2016.

**Appendix**  
**Opioid Use Disorder Treatment Facilities With Programs for Special Populations**  
**Hadland et al.**

**Appendix Figure 1.** Per capita availability of opioid use disorder treatment facilities that provide or allow buprenorphine, naltrexone, or methadone. (A) Any facility<sup>a</sup>; (B) Facilities offering programs for veterans<sup>b</sup>; (C) Facilities offering programs for pregnant and postpartum women<sup>c</sup>; (D) Facilities offering programs for adolescents or accepting adolescent into other programs.<sup>d</sup>

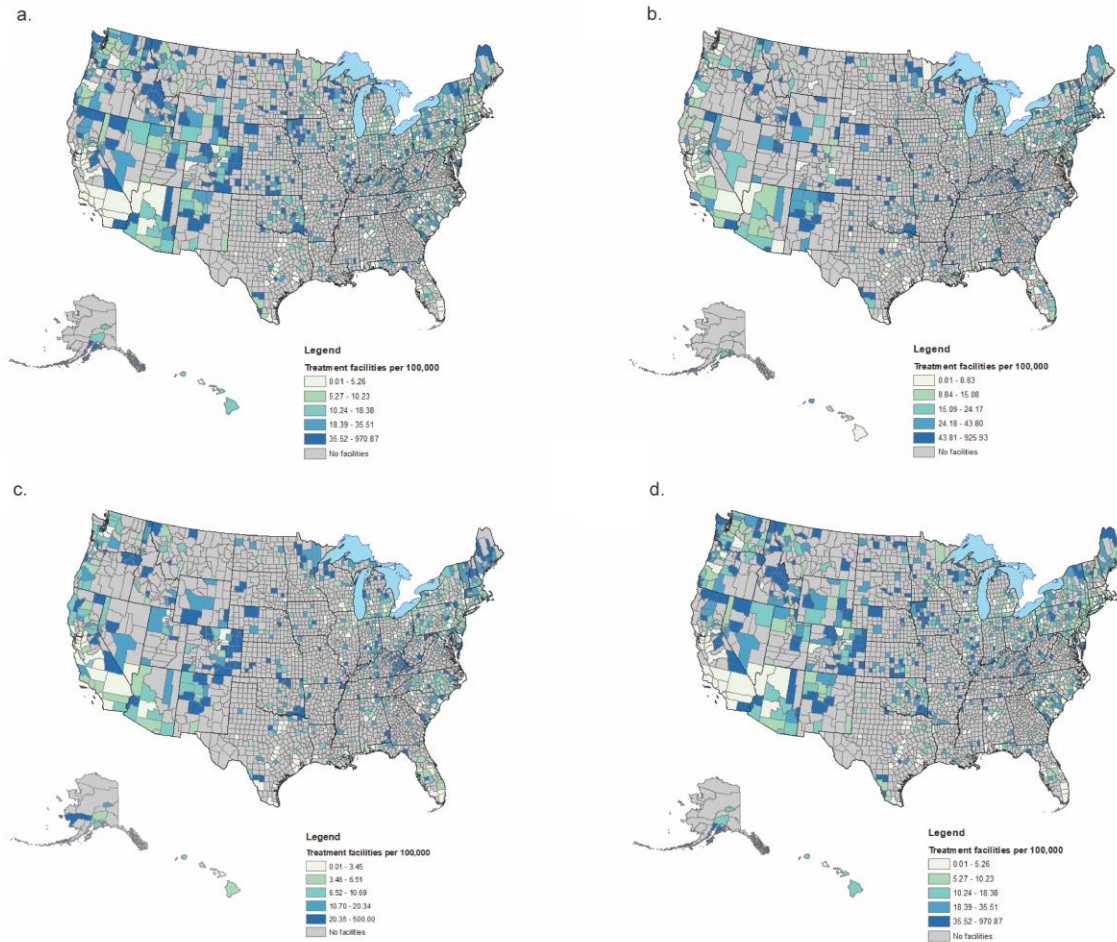

<sup>a</sup>Per 100,000 individuals aged  $\geq 11$  years.

<sup>b</sup>Per 100,000 veterans.

<sup>c</sup>Per 100,000 women aged 15–44 years

<sup>d</sup>Per 100,000 individuals aged 11–17 years.
